# Supplementary material for: Validation of NBD-coupled taurocholic acid for intravital analysis of bile acid transport in liver and kidney of mice
Source: PubMed Central journal article supplement (PMC11579514; doi:10.17179/excli2024-7707), 2024-10-30
Supplement: EXCLI-23-1330-s-003.pdf [file EXCLI-23-1330-s-003.pdf]

## Legends to Supplementary videos

### Original article:

## VALIDATION OF NBD-COUPLED TAUROCHOLIC ACID FOR INTRAVITAL ANALYSIS OF BILE ACID TRANSPORT IN LIVER AND KIDNEY OF MICE

Ahmed Ghallab<sup>1,2\*</sup> , Sebastian Kunz<sup>3</sup> , Celine Drossel<sup>4</sup> , Veronica Billo<sup>3</sup> ,  
Adrian Friebel<sup>5</sup> , Mats Georg<sup>4</sup> , Richard Göttlich<sup>4</sup> , Zaynab Hobloss<sup>1</sup> ,  
Reham Hassan<sup>1,2</sup> , Maiju Myllys<sup>1</sup> , Abdel-latif Seddek<sup>2</sup> , Noha Abdelmageed<sup>6</sup> ,  
Paul A. Dawson<sup>7</sup> , Erik Lindström<sup>8</sup> , Stefan Hoehme<sup>5</sup> , Jan G. Hengstler<sup>1\*#</sup> ,  
Joachim Geyer<sup>3\*#</sup> 

<sup>1</sup> Department of Toxicology, Leibniz Research Centre for Working Environment and Human Factors, Technical University Dortmund, Ardeystr. 67, 44139 Dortmund, Germany

<sup>2</sup> Department of Forensic Medicine and Toxicology, Faculty of Veterinary Medicine, South Valley University, 83523 Qena, Egypt

<sup>3</sup> Institute of Pharmacology and Toxicology, Justus Liebig University Giessen, Biomedical Research Center Seltersberg, Schubertstr. 81, 35392 Giessen, Germany

<sup>4</sup> Institute of Organic Chemistry, Justus Liebig University Giessen, Heinrich-Buff-Ring 17, 35392, Giessen, Germany

<sup>5</sup> Institute of Computer Science & Saxonian Incubator for Clinical Research (SIKT), University of Leipzig, Haertelstraße 16-18, 04107 Leipzig, Germany

<sup>6</sup> Department of Pharmacology, Faculty of Veterinary Medicine, Sohag University, 82524 Sohag, Egypt

<sup>7</sup> Department of Pediatrics, Division of Gastroenterology, Hepatology, and Nutrition, Emory University, Atlanta, GA 30322, USA

<sup>8</sup> Albireo Pharma, Inc., Boston, MA 02109, USA

# Indicates shared senior authorship

\* **Corresponding authors:** Ahmed Ghallab, Jan G. Hengstler, Department of Toxicology, Leibniz Research Centre for Working Environment and Human Factors, Technical University Dortmund, Ardeystr. 67, 44139 Dortmund, Germany. E-mail: [ghallab@ifado.de](mailto:ghallab@ifado.de); [hengstler@ifado.de](mailto:hengstler@ifado.de)

Joachim Geyer, Institute of Pharmacology and Toxicology, Justus Liebig University Giessen, Biomedical Research Center Seltersberg, Schubertstr. 81, 35392 Giessen, Germany. E-mail: [Joachim.M.Geyer@vetmed.uni-giessen.de](mailto:Joachim.M.Geyer@vetmed.uni-giessen.de)

<https://dx.doi.org/10.17179/excli2024-7707>

This is an Open Access article distributed under the terms of the Creative Commons Attribution License (<http://creativecommons.org/licenses/by/4.0/>).

**Suppl. video 1:** Kinetics of 3 $\beta$ -NBD-TCA in the liver of a WT mouse. Red: TMRE; green: 3 $\beta$ -NBD-TCA; blue: Hoechst 33258. The data corresponds to **Figure 5** of the main manuscript.

**Suppl. video 2:** Kinetics of 3 $\beta$ -NBD-TCA in the liver of a WT mouse treated with Myrcludex B. Red: TMRE; green: 3 $\beta$ -NBD-TCA; blue: Hoechst 33258. The data corresponds to **Figure 5** of the main manuscript.

**Suppl. video 3:** Kinetics of 3 $\beta$ -NBD-TCA in the liver of an mOatp1a/1b cluster knockout mouse. Red: TMRE; green: 3 $\beta$ -NBD-TCA; blue: Hoechst 33258. The data corresponds to **Figure 6** of the main manuscript.

**Suppl. video 4:** Kinetics of 3 $\beta$ -NBD-TCA in the liver of an mOatp1a/1b cluster knockout mouse treated with Myrcludex B. Red: TMRE; green: 3 $\beta$ -NBD-TCA; blue: Hoechst 33258. The data corresponds to **Figure 6** of the main manuscript.

**Suppl. video 5:** Kinetics of 3 $\beta$ -NBD-TCA in kidneys of an mOatp1a/1b cluster knockout mouse. Red: TMRE; green: 3 $\beta$ -NBD-TCA; blue: Hoechst 33258. The data corresponds to **Figure 7** of the main manuscript.

**Suppl. video 6:** Kinetics of 3 $\beta$ -NBD-TCA in kidneys of an mOatp1a/1b cluster knockout mouse treated with Myrcludex B. Red: TMRE; green: 3 $\beta$ -NBD-TCA; blue: Hoechst 33258. The data corresponds to **Figure 7** of the main manuscript.

**Suppl. video 7:** Kinetics of 3 $\beta$ -NBD-TCA in kidneys of an mOatp1a/1b cluster knockout mouse treated with Myrcludex B and AS0369. Red: TMRE; green: 3 $\beta$ -NBD-TCA; blue: Hoechst 33258. The data corresponds to **Figure 9** of the main manuscript.
